# Supplementary material for: Chiral Hydroxylation at the Mononuclear Nonheme Fe(II) Center of 4-(S) Hydroxymandelate Synthase – A Structure-Activity Relationship Analysis
Source: PubMed Central journal article supplement (PMC3720870; doi:10.1371/journal.pone.0068932), 2013-07-23

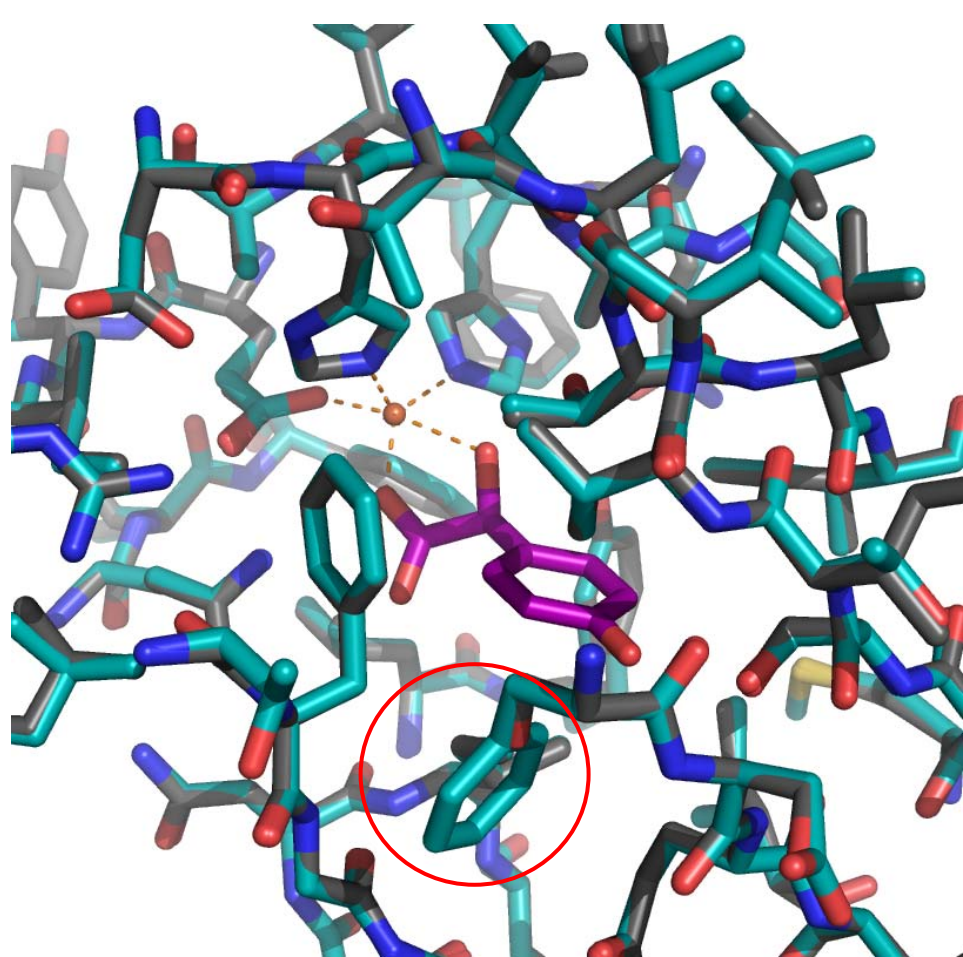

Supplement: pone.0068932.s004.pdf [file pone.0068932.s004.pdf]
